# Supplementary material for: Highly compact refractive index sensor based on stripe waveguides for lab-on-a-chip sensing applications
Source: publisher site journal article supplement (doi:10.3762/bjnano.7.66), 2016-05-25
Supplement: Additional file 1 [file 2190-4286-7-66-S1.pdf]

301 Moved Permanently

# Moved Permanently

The document has moved here.
